# Supplementary material for: Combined analysis of transposable elements and structural variation in maize genomes reveals genome contraction outpaces expansion
Source: PLoS Genet. 2023 Dec 22;19(12):e1011086. doi: 10.1371/journal.pgen.1011086 (PMC10773942; doi:10.1371/journal.pgen.1011086)
Supplement: S3 Table — 224 TEs contributed to ‘TE = SV’ polymorphic TEs in SNP depleted regions that were candidates for relatively recent insertion polymorphisms. Location of these TE annotations, structural variant block identified by AnchorWave, and the SNP depleted region they belong to were provided. (CSV) [file pgen.1011086.s010.csv]

TE_Geno	AW_Comparison_Geno	TE_chr	TE_start	TE_end	TE_name	TE_class	TE_superfamily	TE_family	TE_method	TE_size	AW_chr	AW_start	AW_end	AW_BlockID	AW_Size	SNPD_BlockID
B73_TE	B97	chr1	102259708	102260577	TE_homo_51549	classII	RIL	RIT_jare_AC204843_0	homology	869	chr1	102259696	102260594	chr1_AW_BlockID_21237	898	SNP_Depleted_B73_B97_2
B73_TE	B97	chr1	153934094	153935525	TE_struc_2369	classII	DTA	DTA_ZM00060_consensus	structural	1431	chr1	153934093	153935533	chr1_AW_BlockID_26615	1440	SNP_Depleted_B73_B97_3
B73_TE	B97	chr2	97408974	97416556	repeat_region_9910	classI	RLG	CRM2_7577nt	structural	7582	chr2	97408978	97416556	chr2_AW_BlockID_18359	7578	SNP_Depleted_B73_B97_6
B73_TE	B97	chr2	101174835	101175240	TE_struc_5763	classII	DTA	DTA_ZM00383_consensus	structural	405	chr2	101174835	101175241	chr2_AW_BlockID_18367	406	SNP_Depleted_B73_B97_6
B73_TE	B97	chr2	97236342	97243924	repeat_region_9901	classI	RLG	CRM2_7577nt	structural	7582	chr2	97236339	97243917	chr2_AW_BlockID_18357	7578	SNP_Depleted_B73_B97_6
B73_TE	B97	chr3	80209761	80219995	repeat_region_15334	classI	RLG	prem1_AC212325_11702	structural	10234	chr3	80209760	80219990	chr3_AW_BlockID_13510	10230	SNP_Depleted_B73_B97_7
B73_TE	B97	chr3	87233677	87241255	repeat_region_15503	classI	RLG	CRM2_7577nt	structural	7578	chr3	87233686	87241260	chr3_AW_BlockID_13522	7574	SNP_Depleted_B73_B97_8
B73_TE	B97	chr3	88038473	88046050	repeat_region_15541	classI	RLG	CRM2_7577nt	structural	7577	chr3	88038478	88046051	chr3_AW_BlockID_13532	7573	SNP_Depleted_B73_B97_8
B73_TE	B97	chr3	88053219	88060801	repeat_region_15542	classI	RLG	CRM2_7577nt	structural	7582	chr3	88053218	88060796	chr3_AW_BlockID_13534	7578	SNP_Depleted_B73_B97_8
B73_TE	B97	chr3	88284872	88292451	repeat_region_15548	classI	RLG	CRM2_7577nt	structural	7579	chr3	88284871	88292446	chr3_AW_BlockID_13538	7575	SNP_Depleted_B73_B97_8
B73_TE	B97	chr3	86292476	86300053	repeat_region_15458	classI	RLG	CRM2_7577nt	structural	7577	chr3	86292481	86300054	chr3_AW_BlockID_13520	7573	SNP_Depleted_B73_B97_8
B73_TE	B97	chr3	87307217	87314794	repeat_region_15507	classI	RLG	CRM2_7577nt	structural	7577	chr3	87307221	87314794	chr3_AW_BlockID_13524	7573	SNP_Depleted_B73_B97_8
B73_TE	B97	chr3	87845714	87853292	repeat_region_15534	classI	RLG	CRM2_7577nt	structural	7578	chr3	87845713	87853287	chr3_AW_BlockID_13530	7574	SNP_Depleted_B73_B97_8
B73_TE	B97	chr3	88190159	88197740	repeat_region_15546	classI	RLG	CRM2_7577nt	structural	7581	chr3	88190157	88197734	chr3_AW_BlockID_13536	7577	SNP_Depleted_B73_B97_8
B73_TE	B97	chr3	112327192	112327535	TE_homo_355108	classII	DTH	DTH_ZM00093_consensus	homology	343	chr3	112327191	112327538	chr3_AW_BlockID_14758	347	SNP_Depleted_B73_B97_9
B73_TE	B97	chr3	103984898	103994254	repeat_region_15931	classI	RLC	ji_AC215728_13156	structural	9356	chr3	103984903	103994255	chr3_AW_BlockID_14746	9352	SNP_Depleted_B73_B97_9
B73_TE	B97	chr3	121651963	121657206	repeat_region_16342	classI	RLG	B73_chr3:121651968..121657201	structural	5243	chr3	121651962	121657201	chr3_AW_BlockID_14784	5239	SNP_Depleted_B73_B97_10
B73_TE	B97	chr3	156547913	156548308	TE_struc_8993	classII	DTA	DTA_ZM00383_consensus	structural	395	chr3	156547910	156548307	chr3_AW_BlockID_17627	397	SNP_Depleted_B73_B97_12
B73_TE	B97	chr4	60206393	60207322	TE_homo_452506	classI	RLG	CRM2_7577nt	homology	929	chr4	60206390	60207322	chr4_AW_BlockID_8690	932	SNP_Depleted_B73_B97_14
B73_TE	B97	chr4	134712893	134718544	repeat_region_22446	classI	RLG	magellan_AC194897_4313	structural	5651	chr4	134712898	134718545	chr4_AW_BlockID_15998	5647	SNP_Depleted_B73_B97_15
B73_TE	B97	chr4	140486216	140495075	repeat_region_22584	classI	RLX	ji_AC204382_8228	structural	8859	chr4	140486221	140495076	chr4_AW_BlockID_16006	8855	SNP_Depleted_B73_B97_15
B73_TE	B97	chr8	77502649	77502786	TE_homo_957295	classII	DTH	TE_00001759	homology	137	chr8	77502649	77502790	chr8_AW_BlockID_11610	141	SNP_Depleted_B73_B97_19
B73_TE	CML103	chr5	106394033	106401614	repeat_region_28003	classI	RLG	CRM2_7577nt	structural	7581	chr5	106394032	106401609	chr5_AW_BlockID_16646	7577	SNP_Depleted_B73_CML103_26
B73_TE	CML103	chr5	114803966	114804361	TE_struc_14661	classII	DTA	DTA_ZM00383_consensus	structural	395	chr5	114803966	114804370	chr5_AW_BlockID_16658	404	SNP_Depleted_B73_CML103_28
B73_TE	CML103	chr5	115478025	115478420	TE_homo_618073	classII	DTA	DTA_ZM00383_consensus	homology	395	chr5	115478016	115478420	chr5_AW_BlockID_16660	404	SNP_Depleted_B73_CML103_28
B73_TE	CML103	chr6	56386421	56398327	repeat_region_32279	classI	RLG	prem1_AC196065_4927	structural	11906	chr6	56386420	56398322	chr6_AW_BlockID_5692	11902	SNP_Depleted_B73_CML103_32
B73_TE	CML103	chr6	64819043	64827902	repeat_region_32508	classI	RLX	ji_AC204382_8228	structural	8859	chr6	64819042	64827897	chr6_AW_BlockID_5708	8855	SNP_Depleted_B73_CML103_33
B73_TE	CML103	chr8	96485659	96494706	repeat_region_42258	classI	RLC	opie_AC198924_6206	structural	9047	chr8	96485663	96494706	chr8_AW_BlockID_15121	9043	SNP_Depleted_B73_CML103_34
B73_TE	CML228	chr5	114803966	114804361	TE_struc_14661	classII	DTA	DTA_ZM00383_consensus	structural	395	chr5	114803966	114804370	chr5_AW_BlockID_19196	404	SNP_Depleted_B73_CML228_37
B73_TE	CML228	chr5	115478025	115478420	TE_homo_618073	classII	DTA	DTA_ZM00383_consensus	homology	395	chr5	115478016	115478420	chr5_AW_BlockID_19198	404	SNP_Depleted_B73_CML228_37
B73_TE	CML322	chr2	80599456	80599691	TE_struc_5662	classII	DTC	B73_chr2:80599456..80599691	structural	235	chr2	80599455	80599694	chr2_AW_BlockID_16130	239	SNP_Depleted_B73_CML322_39
B73_TE	CML322	chr2	80881232	80881370	TE_homo_205946	classII	DTH	DTH_ZM00358_consensus	homology	138	chr2	80881232	80881373	chr2_AW_BlockID_16132	141	SNP_Depleted_B73_CML322_39
B73_TE	CML322	chr2	86070046	86079345	repeat_region_9602	classI	RLC	ji_AC215728_13156	structural	9299	chr2	86070045	86079340	chr2_AW_BlockID_16134	9295	SNP_Depleted_B73_CML322_39
B73_TE	CML333	chr4	144127661	144132904	repeat_region_22667	classI	RLG	B73_chr4:144127666..144132899	structural	5243	chr4	144127666	144132905	chr4_AW_BlockID_20092	5239	SNP_Depleted_B73_CML333_44
B73_TE	CML52	chr4	127005481	127005877	TE_struc_11597	classII	DTA	DTA_ZM00383_consensus	structural	396	chr4	127005479	127005876	chr4_AW_BlockID_17910	397	SNP_Depleted_B73_CML52_47
B73_TE	HP301	chr2	80599456	80599691	TE_struc_5662	classII	DTC	B73_chr2:80599456..80599691	structural	235	chr2	80599455	80599694	chr2_AW_BlockID_15294	239	SNP_Depleted_B73_HP301_48
B73_TE	HP301	chr6	56386421	56398327	repeat_region_32279	classI	RLG	prem1_AC196065_4927	structural	11906	chr6	56386420	56398322	chr6_AW_BlockID_5698	11902	SNP_Depleted_B73_HP301_52
B73_TE	HP301	chr6	64819043	64827902	repeat_region_32508	classI	RLX	ji_AC204382_8228	structural	8859	chr6	64819042	64827897	chr6_AW_BlockID_5710	8855	SNP_Depleted_B73_HP301_53
B73_TE	HP301	chr7	95887412	95896717	repeat_region_37678	classI	RLC	ji_AC215728_13156	structural	9305	chr7	95887416	95896717	chr7_AW_BlockID_11941	9301	SNP_Depleted_B73_HP301_56
B73_TE	HP301	chr8	91062026	91062432	TE_struc_21485	classII	DTA	DTA_ZM00383_consensus	structural	406	chr8	91062026	91062441	chr8_AW_BlockID_15957	415	SNP_Depleted_B73_HP301_58
B73_TE	Ki11	chr4	134712893	134718544	repeat_region_22446	classI	RLG	magellan_AC194897_4313	structural	5651	chr4	134712898	134718545	chr4_AW_BlockID_17777	5647	SNP_Depleted_B73_Ki11_64
B73_TE	Ki3	chr5	114803966	114804361	TE_struc_14661	classII	DTA	DTA_ZM00383_consensus	structural	395	chr5	114803966	114804370	chr5_AW_BlockID_20094	404	SNP_Depleted_B73_Ki3_68
B73_TE	Ki3	chr5	115478025	115478420	TE_homo_618073	classII	DTA	DTA_ZM00383_consensus	homology	395	chr5	115478016	115478420	chr5_AW_BlockID_20098	404	SNP_Depleted_B73_Ki3_68
B73_TE	Ky21	chr10	28108779	28118110	repeat_region_48886	classI	RLC	ji_AC215728_13156	structural	9331	chr10	28108778	28118105	chr10_AW_BlockID_5569	9327	SNP_Depleted_B73_Ky21_70
B73_TE	Ky21	chr10	37517498	37517893	TE_struc_25344	classII	DTA	DTA_ZM00383_consensus	structural	395	chr10	37517498	37517896	chr10_AW_BlockID_5583	398	SNP_Depleted_B73_Ky21_71
B73_TE	Ky21	chr10	39489089	39497362	repeat_region_49135	classI	RLX	prem1_AC196065_4927	structural	8273	chr10	39489088	39497357	chr10_AW_BlockID_5585	8269	SNP_Depleted_B73_Ky21_71
B73_TE	Ky21	chr10	43195351	43195653	TE_homo_1135043	classI	RLX	TE_00013780_LTR	homology	302	chr10	43195345	43195653	chr10_AW_BlockID_5591	308	SNP_Depleted_B73_Ky21_71
B73_TE	Ky21	chr10	50639492	50647071	repeat_region_49359	classI	RLG	CRM2_7577nt	structural	7579	chr10	50639491	50647066	chr10_AW_BlockID_5607	7575	SNP_Depleted_B73_Ky21_72
B73_TE	Ky21	chr10	51162616	51170195	repeat_region_49377	classI	RLG	CRM2_7577nt	structural	7579	chr10	51162615	51170190	chr10_AW_BlockID_5609	7575	SNP_Depleted_B73_Ky21_72
B73_TE	Ky21	chr10	51997631	52005209	repeat_region_49404	classI	RLG	CRM2_7577nt	structural	7578	chr10	51997630	52005204	chr10_AW_BlockID_5621	7574	SNP_Depleted_B73_Ky21_72
B73_TE	Ky21	chr10	52096615	52104194	repeat_region_49408	classI	RLG	CRM2_7577nt	structural	7579	chr10	52096619	52104194	chr10_AW_BlockID_5623	7575	SNP_Depleted_B73_Ky21_72
B73_TE	Ky21	chr10	70491138	70500485	repeat_region_49888	classI	RLC	ji_AC215728_13156	structural	9347	chr10	70491137	70500480	chr10_AW_BlockID_5643	9343	SNP_Depleted_B73_Ky21_73
B73_TE	Ky21	chr3	80209761	80219995	repeat_region_15334	classI	RLG	prem1_AC212325_11702	structural	10234	chr3	80209760	80219990	chr3_AW_BlockID_12667	10230	SNP_Depleted_B73_Ky21_81
B73_TE	Ky21	chr3	87233677	87241255	repeat_region_15503	classI	RLG	CRM2_7577nt	structural	7578	chr3	87233681	87241255	chr3_AW_BlockID_12689	7574	SNP_Depleted_B73_Ky21_82
B73_TE	Ky21	chr3	87588880	87596463	repeat_region_15523	classI	RLG	CRM2_7577nt	structural	7583	chr3	87588879	87596458	chr3_AW_BlockID_12695	7579	SNP_Depleted_B73_Ky21_82
B73_TE	Ky21	chr3	88038473	88046050	repeat_region_15541	classI	RLG	CRM2_7577nt	structural	7577	chr3	88038478	88046051	chr3_AW_BlockID_12705	7573	SNP_Depleted_B73_Ky21_82
B73_TE	Ky21	chr3	88053219	88060801	repeat_region_15542	classI	RLG	CRM2_7577nt	structural	7582	chr3	88053218	88060796	chr3_AW_BlockID_12707	7578	SNP_Depleted_B73_Ky21_82
B73_TE	Ky21	chr3	88284872	88292451	repeat_region_15548	classI	RLG	CRM2_7577nt	structural	7579	chr3	88284871	88292446	chr3_AW_BlockID_12711	7575	SNP_Depleted_B73_Ky21_82
B73_TE	Ky21	chr3	91310371	91319092	repeat_region_15617	classI	RLX	odoj_AC194387_4072	structural	8721	chr3	91310368	91319085	chr3_AW_BlockID_12717	8717	SNP_Depleted_B73_Ky21_82
B73_TE	Ky21	chr3	92563096	92567546	TE_struc_8514	classII	DTC	B73_chr3:92563096..92567546	structural	4450	chr3	92563095	92567549	chr3_AW_BlockID_12721	4454	SNP_Depleted_B73_Ky21_82
B73_TE	Ky21	chr3	92566766	92567100	TE_homo_344469	classI	RLC	TE_00004503_INT	homology	334	chr3	92563095	92567549	chr3_AW_BlockID_12721	4454	SNP_Depleted_B73_Ky21_82
B73_TE	Ky21	chr3	86292476	86300053	repeat_region_15458	classI	RLG	CRM2_7577nt	structural	7577	chr3	86292481	86300054	chr3_AW_BlockID_12683	7573	SNP_Depleted_B73_Ky21_82
B73_TE	Ky21	chr3	87307217	87314794	repeat_region_15507	classI	RLG	CRM2_7577nt	structural	7577	chr3	87307221	87314794	chr3_AW_BlockID_12691	7573	SNP_Depleted_B73_Ky21_82
B73_TE	Ky21	chr3	87845714	87853292	repeat_region_15534	classI	RLG	CRM2_7577nt	structural	7578	chr3	87845713	87853287	chr3_AW_BlockID_12701	7574	SNP_Depleted_B73_Ky21_82
B73_TE	Ky21	chr3	88190159	88197740	repeat_region_15546	classI	RLG	CRM2_7577nt	structural	7581	chr3	88190157	88197734	chr3_AW_BlockID_12709	7577	SNP_Depleted_B73_Ky21_82
B73_TE	Ky21	chr3	90106112	90116287	repeat_region_15592	classI	RLG	prem1_AC200105_6751	structural	10175	chr3	90106116	90116287	chr3_AW_BlockID_12713	10171	SNP_Depleted_B73_Ky21_82
B73_TE	Ky21	chr3	103984898	103994254	repeat_region_15931	classI	RLC	ji_AC215728_13156	structural	9356	chr3	103984903	103994255	chr3_AW_BlockID_12729	9352	SNP_Depleted_B73_Ky21_82
B73_TE	Ky21	chr4	134712893	134718544	repeat_region_22446	classI	RLG	magellan_AC194897_4313	structural	5651	chr4	134712898	134718545	chr4_AW_BlockID_17000	5647	SNP_Depleted_B73_Ky21_86
B73_TE	Ky21	chr6	56386421	56398327	repeat_region_32279	classI	RLG	prem1_AC196065_4927	structural	11906	chr6	56386420	56398322	chr6_AW_BlockID_5519	11902	SNP_Depleted_B73_Ky21_90
B73_TE	Ky21	chr6	64819043	64827902	repeat_region_32508	classI	RLX	ji_AC204382_8228	structural	8859	chr6	64819047	64827902	chr6_AW_BlockID_5531	8855	SNP_Depleted_B73_Ky21_91
B73_TE	Ky21	chr7	47443042	47443903	TE_struc_18847	classII	DTA	DTA_ZM00101_consensus	structural	861	chr7	47443041	47443911	chr7_AW_BlockID_9137	870	SNP_Depleted_B73_Ky21_92
B73_TE	Ky21	chr7	44657188	44666545	repeat_region_36426	classI	RLC	ji_AC215728_13156	structural	9357	chr7	44657187	44666540	chr7_AW_BlockID_9129	9353	SNP_Depleted_B73_Ky21_92
B73_TE	Ky21	chr7	80478466	80482639	TE_struc_18960	classII	DTC	B73_chr7:80478466..80482639	structural	4173	chr7	80478466	80482639	chr7_AW_BlockID_9207	4173	SNP_Depleted_B73_Ky21_94
B73_TE	Ky21	chr7	80479098	80479185	TE_homo_851481	classI	RLC	TE_00001606_INT	homology	87	chr7	80478466	80482639	chr7_AW_BlockID_9207	4173	SNP_Depleted_B73_Ky21_94
B73_TE	Ky21	chr7	67220308	67223713	TE_struc_18919	classII	DTC	DTC_ZM00045_consensus	structural	3405	chr7	67220304	67223713	chr7_AW_BlockID_9183	3409	SNP_Depleted_B73_Ky21_94
B73_TE	Ky21	chr8	134379593	134388071	repeat_region_43166	classI	RLX	ji_AC204382_8228	structural	8478	chr8	134379592	134388066	chr8_AW_BlockID_20139	8474	SNP_Depleted_B73_Ky21_95
B73_TE	M162W	chr1	270830894	270831179	TE_homo_145749	classII	DTH	ZM_Tourist_11	homology	285	chr1	270830896	270831179	chr1_AW_BlockID_48156	283	SNP_Depleted_B73_M162W_99
B73_TE	M37W	chr3	52112087	52120946	repeat_region_14675	classI	RLX	ji_AC204382_8228	structural	8859	chr3	52112091	52120946	chr3_AW_BlockID_11213	8855	SNP_Depleted_B73_M37W_109
B73_TE	M37W	chr4	48667696	48668091	TE_struc_11141	classII	DTA	DTA_ZM00383_consensus	structural	395	chr4	48667696	48668092	chr4_AW_BlockID_9185	396	SNP_Depleted_B73_M37W_110
B73_TE	M37W	chr4	52630942	52631819	TE_struc_11170	classII	DTA	DTA_ZM00062_consensus	structural	877	chr4	52630942	52631821	chr4_AW_BlockID_9191	879	SNP_Depleted_B73_M37W_110
B73_TE	Mo18W	chr10	18731844	18740703	repeat_region_48645	classI	RLX	ji_AC204382_8228	structural	8859	chr10	18731848	18740703	chr10_AW_BlockID_3394	8855	SNP_Depleted_B73_Mo18W_115
B73_TE	Mo18W	chr10	22475164	22484023	repeat_region_48740	classI	RLX	ji_AC204382_8228	structural	8859	chr10	22475163	22484018	chr10_AW_BlockID_3398	8855	SNP_Depleted_B73_Mo18W_115
B73_TE	Mo18W	chr10	73071797	73077040	repeat_region_49955	classI	RLG	B73_chr10:73071802..73077035	structural	5243	chr10	73071796	73077035	chr10_AW_BlockID_6958	5239	SNP_Depleted_B73_Mo18W_116
B73_TE	Mo18W	chr10	73072015	73076686	TE_homo_1152980	classI	RLG	bosohe_AC205330_8724	homology	4671	chr10	73071796	73077035	chr10_AW_BlockID_6958	5239	SNP_Depleted_B73_Mo18W_116
B73_TE	Mo18W	chr3	52112087	52120946	repeat_region_14675	classI	RLX	ji_AC204382_8228	structural	8859	chr3	52112091	52120946	chr3_AW_BlockID_11535	8855	SNP_Depleted_B73_Mo18W_117
B73_TE	Ms71	chr1	172205246	172208244	TE_struc_2503	classII	DTH	TE_00008148	structural	2998	chr1	172205246	172208250	chr1_AW_BlockID_28566	3004	SNP_Depleted_B73_Ms71_120
B73_TE	Ms71	chr1	172205524	172205655	TE_homo_94970	classI	RLX	TE_00010937_INT	homology	131	chr1	172205246	172208250	chr1_AW_BlockID_28566	3004	SNP_Depleted_B73_Ms71_120
B73_TE	Ms71	chr1	174115722	174124566	repeat_region_4224	classI	RLX	ji_AC204382_8228	structural	8844	chr1	174115726	174124566	chr1_AW_BlockID_28570	8840	SNP_Depleted_B73_Ms71_120
B73_TE	Ms71	chr3	87233677	87241255	repeat_region_15503	classI	RLG	CRM2_7577nt	structural	7578	chr3	87233686	87241260	chr3_AW_BlockID_12403	7574	SNP_Depleted_B73_Ms71_126
B73_TE	Ms71	chr3	88038473	88046050	repeat_region_15541	classI	RLG	CRM2_7577nt	structural	7577	chr3	88038478	88046051	chr3_AW_BlockID_12415	7573	SNP_Depleted_B73_Ms71_126
B73_TE	Ms71	chr3	88053219	88060801	repeat_region_15542	classI	RLG	CRM2_7577nt	structural	7582	chr3	88053218	88060796	chr3_AW_BlockID_12417	7578	SNP_Depleted_B73_Ms71_126
B73_TE	Ms71	chr3	88284872	88292451	repeat_region_15548	classI	RLG	CRM2_7577nt	structural	7579	chr3	88284871	88292446	chr3_AW_BlockID_12423	7575	SNP_Depleted_B73_Ms71_126
B73_TE	Ms71	chr3	91310371	91319092	repeat_region_15617	classI	RLX	odoj_AC194387_4072	structural	8721	chr3	91310368	91319085	chr3_AW_BlockID_12427	8717	SNP_Depleted_B73_Ms71_126
B73_TE	Ms71	chr3	92563096	92567546	TE_struc_8514	classII	DTC	B73_chr3:92563096..92567546	structural	4450	chr3	92563095	92567549	chr3_AW_BlockID_12429	4454	SNP_Depleted_B73_Ms71_126
B73_TE	Ms71	chr3	92566766	92567100	TE_homo_344469	classI	RLC	TE_00004503_INT	homology	334	chr3	92563095	92567549	chr3_AW_BlockID_12429	4454	SNP_Depleted_B73_Ms71_126
B73_TE	Ms71	chr3	86292476	86300053	repeat_region_15458	classI	RLG	CRM2_7577nt	structural	7577	chr3	86292475	86300048	chr3_AW_BlockID_12397	7573	SNP_Depleted_B73_Ms71_126
B73_TE	Ms71	chr3	87307217	87314794	repeat_region_15507	classI	RLG	CRM2_7577nt	structural	7577	chr3	87307221	87314794	chr3_AW_BlockID_12405	7573	SNP_Depleted_B73_Ms71_126
B73_TE	Ms71	chr3	87845714	87853292	repeat_region_15534	classI	RLG	CRM2_7577nt	structural	7578	chr3	87845713	87853287	chr3_AW_BlockID_12413	7574	SNP_Depleted_B73_Ms71_126
B73_TE	Ms71	chr3	88190159	88197740	repeat_region_15546	classI	RLG	CRM2_7577nt	structural	7581	chr3	88190157	88197734	chr3_AW_BlockID_12421	7577	SNP_Depleted_B73_Ms71_126
B73_TE	Ms71	chr3	80209761	80219995	repeat_region_15334	classI	RLG	prem1_AC212325_11702	structural	10234	chr3	80209760	80219990	chr3_AW_BlockID_12389	10230	SNP_Depleted_B73_Ms71_126
B73_TE	Ms71	chr4	134712893	134718544	repeat_region_22446	classI	RLG	magellan_AC194897_4313	structural	5651	chr4	134712898	134718545	chr4_AW_BlockID_16690	5647	SNP_Depleted_B73_Ms71_128
B73_TE	Ms71	chr6	129278469	129278864	TE_struc_17193	classII	DTA	DTA_ZM00383_consensus	structural	395	chr6	129278460	129278864	chr6_AW_BlockID_17873	404	SNP_Depleted_B73_Ms71_134
B73_TE	Ms71	chr8	91062026	91062432	TE_struc_21485	classII	DTA	DTA_ZM00383_consensus	structural	406	chr8	91062026	91062441	chr8_AW_BlockID_13355	415	SNP_Depleted_B73_Ms71_137
B73_TE	NC358	chr5	106394033	106401614	repeat_region_28003	classI	RLG	CRM2_7577nt	structural	7581	chr5	106394037	106401614	chr5_AW_BlockID_17349	7577	SNP_Depleted_B73_NC358_141
B73_TE	NC358	chr5	114803966	114804361	TE_struc_14661	classII	DTA	DTA_ZM00383_consensus	structural	395	chr5	114803966	114804370	chr5_AW_BlockID_17369	404	SNP_Depleted_B73_NC358_143
B73_TE	NC358	chr5	115478025	115478420	TE_homo_618073	classII	DTA	DTA_ZM00383_consensus	homology	395	chr5	115478016	115478420	chr5_AW_BlockID_17371	404	SNP_Depleted_B73_NC358_143
B73_TE	Oh43	chr1	102259708	102260577	TE_homo_51549	classII	RIL	RIT_jare_AC204843_0	homology	869	chr1	102259696	102260594	chr1_AW_BlockID_20674	898	SNP_Depleted_B73_Oh43_145
B73_TE	Oh43	chr1	176157247	176157642	TE_struc_2545	classII	DTA	DTA_ZM00383_consensus	structural	395	chr1	176157244	176157643	chr1_AW_BlockID_28839	399	SNP_Depleted_B73_Oh43_146
B73_TE	Oh43	chr10	73071797	73077040	repeat_region_49955	classI	RLG	B73_chr10:73071802..73077035	structural	5243	chr10	73071796	73077035	chr10_AW_BlockID_8765	5239	SNP_Depleted_B73_Oh43_147
B73_TE	Oh43	chr10	73072015	73076686	TE_homo_1152980	classI	RLG	bosohe_AC205330_8724	homology	4671	chr10	73071796	73077035	chr10_AW_BlockID_8765	5239	SNP_Depleted_B73_Oh43_147
B73_TE	Oh43	chr5	43161543	43161712	TE_struc_14147	classII	DTC	B73_chr5:43161543..43161712	structural	169	chr5	43161541	43161712	chr5_AW_BlockID_10460	171	SNP_Depleted_B73_Oh43_153
B73_TE	Oh43	chr5	105059751	105067315	TE_homo_611772	classI	RLG	CRM2_7577nt	homology	7564	chr5	105059748	105067315	chr5_AW_BlockID_17119	7567	SNP_Depleted_B73_Oh43_156
B73_TE	Oh43	chr5	106394033	106401614	repeat_region_28003	classI	RLG	CRM2_7577nt	structural	7581	chr5	106394032	106401609	chr5_AW_BlockID_17125	7577	SNP_Depleted_B73_Oh43_156
B73_TE	Oh43	chr5	114803966	114804361	TE_struc_14661	classII	DTA	DTA_ZM00383_consensus	structural	395	chr5	114803966	114804370	chr5_AW_BlockID_17139	404	SNP_Depleted_B73_Oh43_158
B73_TE	Oh43	chr5	115478025	115478420	TE_homo_618073	classII	DTA	DTA_ZM00383_consensus	homology	395	chr5	115478016	115478420	chr5_AW_BlockID_17141	404	SNP_Depleted_B73_Oh43_158
B73_TE	Oh43	chr5	120594641	120595179	TE_struc_14690	classII	DTA	DTA_ZM00169_consensus	structural	538	chr5	120594639	120595175	chr5_AW_BlockID_17147	536	SNP_Depleted_B73_Oh43_158
B73_TE	Oh43	chr6	119164073	119173378	repeat_region_33820	classI	RLC	ji_AC215728_13156	structural	9305	chr6	119164072	119173373	chr6_AW_BlockID_14138	9301	SNP_Depleted_B73_Oh43_163
B73_TE	Oh43	chr8	91062026	91062432	TE_struc_21485	classII	DTA	DTA_ZM00383_consensus	structural	406	chr8	91062026	91062441	chr8_AW_BlockID_12150	415	SNP_Depleted_B73_Oh43_166
B73_TE	Oh43	chr8	134379593	134388071	repeat_region_43166	classI	RLX	ji_AC204382_8228	structural	8478	chr8	134379597	134388071	chr8_AW_BlockID_16498	8474	SNP_Depleted_B73_Oh43_169
B73_TE	Oh7B	chr1	102259708	102260577	TE_homo_51549	classII	RIL	RIT_jare_AC204843_0	homology	869	chr1	102259696	102260594	chr1_AW_BlockID_21224	898	SNP_Depleted_B73_Oh7B_170
B73_TE	Oh7B	chr2	162193531	162205762	repeat_region_11392	classI	RLG	prem1_AC196065_4927	structural	12231	chr2	162193530	162205757	chr2_AW_BlockID_25370	12227	SNP_Depleted_B73_Oh7B_176
B73_TE	Oh7B	chr3	52112087	52120946	repeat_region_14675	classI	RLX	ji_AC204382_8228	structural	8859	chr3	52112091	52120946	chr3_AW_BlockID_10416	8855	SNP_Depleted_B73_Oh7B_179
B73_TE	Oh7B	chr3	59913318	59913723	TE_struc_8374	classII	DTA	DTA_ZM00383_consensus	structural	405	chr3	59913309	59913723	chr3_AW_BlockID_11064	414	SNP_Depleted_B73_Oh7B_180
B73_TE	Oh7B	chr4	157817606	157828434	repeat_region_22995	classI	RLX	giepum_AC211155_11010	structural	10828	chr4	157817610	157828434	chr4_AW_BlockID_18160	10824	SNP_Depleted_B73_Oh7B_186
B73_TE	Oh7B	chr6	111610734	111610873	TE_homo_763095	classII	DTH	DTH_ZM00358_consensus	homology	139	chr6	111610731	111610872	chr6_AW_BlockID_12278	141	SNP_Depleted_B73_Oh7B_190
B73_TE	Oh7B	chr8	42406416	42406811	TE_struc_21176	classII	DTA	DTA_ZM00383_consensus	structural	395	chr8	42406415	42406819	chr8_AW_BlockID_6466	404	SNP_Depleted_B73_Oh7B_192
B73_TE	Oh7B	chr8	51056622	51064201	repeat_region_41125	classI	RLG	CRM2_7577nt	structural	7579	chr8	51056626	51064201	chr8_AW_BlockID_6482	7575	SNP_Depleted_B73_Oh7B_193
B73_TE	Oh7B	chr8	52174720	52182300	repeat_region_41168	classI	RLG	CRM2_7577nt	structural	7580	chr8	52174724	52182300	chr8_AW_BlockID_6484	7576	SNP_Depleted_B73_Oh7B_193
B73_TE	Oh7B	chr8	68632592	68636013	TE_struc_21313	classII	DTA	B73_chr8:68632592..68636013	structural	3421	chr8	68632592	68636014	chr8_AW_BlockID_6494	3422	SNP_Depleted_B73_Oh7B_193
B73_TE	Oh7B	chr8	50393019	50400599	repeat_region_41100	classI	RLG	CRM2_7577nt	structural	7580	chr8	50393018	50400594	chr8_AW_BlockID_6470	7576	SNP_Depleted_B73_Oh7B_193
B73_TE	Oh7B	chr8	51045984	51053567	repeat_region_41124	classI	RLG	CRM2_7577nt	structural	7583	chr8	51045988	51053567	chr8_AW_BlockID_6480	7579	SNP_Depleted_B73_Oh7B_193
B73_TE	Oh7B	chr8	96485659	96494706	repeat_region_42258	classI	RLC	opie_AC198924_6206	structural	9047	chr8	96485663	96494706	chr8_AW_BlockID_9127	9043	SNP_Depleted_B73_Oh7B_194
B73_TE	Oh7B	chr8	91062026	91062432	TE_struc_21485	classII	DTA	DTA_ZM00383_consensus	structural	406	chr8	91062026	91062441	chr8_AW_BlockID_9115	415	SNP_Depleted_B73_Oh7B_194
B73_TE	Oh7B	chr9	41549745	41561969	repeat_region_45297	classI	RLX	ji_AC209892_10463	structural	12224	chr9	41549749	41561969	chr9_AW_BlockID_6592	12220	SNP_Depleted_B73_Oh7B_196
B73_TE	Oh7B	chr9	49730229	49730539	TE_homo_1052378	classII	DTC	DTC_ZM00089_consensus	homology	310	chr9	49730228	49730535	chr9_AW_BlockID_6602	307	SNP_Depleted_B73_Oh7B_197
B73_TE	Oh7B	chr9	55543488	55551069	repeat_region_45603	classI	RLG	CRM2_7577nt	structural	7581	chr9	55543494	55551071	chr9_AW_BlockID_6604	7577	SNP_Depleted_B73_Oh7B_197
B73_TE	Oh7B	chr9	56008356	56012567	repeat_region_45615	classI	RLG	CRM2_7577nt	structural	4211	chr9	56008360	56012567	chr9_AW_BlockID_6610	4207	SNP_Depleted_B73_Oh7B_197
B73_TE	Oh7B	chr9	57367552	57375131	repeat_region_45658	classI	RLG	CRM2_7577nt	structural	7579	chr9	57367556	57375131	chr9_AW_BlockID_6612	7575	SNP_Depleted_B73_Oh7B_197
B73_TE	Oh7B	chr9	69442277	69442589	TE_homo_1064475	classII	DTC	DTC_ZM00089_consensus	homology	312	chr9	69442277	69442584	chr9_AW_BlockID_6634	307	SNP_Depleted_B73_Oh7B_199
B73_TE	Oh7B	chr9	72689168	72689563	TE_struc_23637	classII	DTA	DTA_ZM00383_consensus	structural	395	chr9	72689167	72689564	chr9_AW_BlockID_6640	397	SNP_Depleted_B73_Oh7B_199
B73_TE	Oh7B	chr9	71246306	71255232	repeat_region_45981	classI	RLX	ji_AC204382_8228	structural	8926	chr9	71246310	71255232	chr9_AW_BlockID_6638	8922	SNP_Depleted_B73_Oh7B_199
B73_TE	Tx303	chr3	59913318	59913723	TE_struc_8374	classII	DTA	DTA_ZM00383_consensus	structural	405	chr3	59913309	59913723	chr3_AW_BlockID_11440	414	SNP_Depleted_B73_Tx303_205
B73_TE	Tx303	chr9	124533138	124538429	repeat_region_47200	classI	RLC	seufyt_AC194940_4361	structural	5291	chr9	124533136	124538423	chr9_AW_BlockID_21401	5287	SNP_Depleted_B73_Tx303_209
B73_TE	Tzi8	chr2	150771496	150772871	TE_homo_246812	classII	DTA	DTA_ZM00216_consensus	homology	1375	chr2	150771487	150772871	chr2_AW_BlockID_25172	1384	SNP_Depleted_B73_Tzi8_210
B73_TE	Tzi8	chr2	152165188	152165583	TE_homo_247475	classII	DTA	DTA_ZM00383_consensus	homology	395	chr2	152165188	152165584	chr2_AW_BlockID_25176	396	SNP_Depleted_B73_Tzi8_210
NAM_TE	B97	chr10	106001462	106001631	TE_struc_25817	classII	DTC	B97_chr10:106001462..106001631	structural	169	chr10	106001458	106001631	chr10_AW_BlockID_14519	173	SNP_Depleted_B73_B97_5
NAM_TE	B97	chr2	96368818	96369747	TE_homo_211929	classI	RLG	CRM2_7577nt	homology	929	chr2	96368812	96369747	chr2_AW_BlockID_18353	935	SNP_Depleted_B73_B97_6
NAM_TE	B97	chr3	107479672	107480067	TE_struc_8429	classII	DTA	DTA_ZM00383_consensus	structural	395	chr3	107479653	107480057	chr3_AW_BlockID_14752	404	SNP_Depleted_B73_B97_9
NAM_TE	B97	chr3	109695682	109707907	repeat_region_16135	classI	RLX	ji_AC209892_10463	structural	12225	chr3	109695681	109707902	chr3_AW_BlockID_14754	12221	SNP_Depleted_B73_B97_9
NAM_TE	B97	chr4	139163536	139163842	TE_homo_528510	classII	DTC	DTC_ZM00089_consensus	homology	306	chr4	139163533	139163839	chr4_AW_BlockID_16004	306	SNP_Depleted_B73_B97_15
NAM_TE	B97	chr8	84157622	84165996	repeat_region_41939	classI	RLX	TE_00002541	structural	8374	chr8	84157626	84165996	chr8_AW_BlockID_12174	8370	SNP_Depleted_B73_B97_20
NAM_TE	CML103	chr5	104912154	104919735	repeat_region_27959	classI	RLG	CRM2_7577nt	structural	7581	chr5	104912158	104919735	chr5_AW_BlockID_16642	7577	SNP_Depleted_B73_CML103_26
NAM_TE	CML103	chr6	59851285	59851680	TE_struc_16081	classII	DTA	DTA_ZM00383_consensus	structural	395	chr6	59851274	59851678	chr6_AW_BlockID_5706	404	SNP_Depleted_B73_CML103_33
NAM_TE	CML228	chr4	131377501	131387125	repeat_region_22595	classI	RLG	cinful_zeon_AC206171_9091	structural	9624	chr4	131377500	131387120	chr4_AW_BlockID_16627	9620	SNP_Depleted_B73_CML228_36
NAM_TE	CML333	chr1	51517687	51518092	TE_struc_1569	classII	DTA	DTA_ZM00383_consensus	structural	405	chr1	51517686	51518100	chr1_AW_BlockID_12542	414	SNP_Depleted_B73_CML333_42
NAM_TE	CML52	chr4	126978546	126988460	repeat_region_22358	classI	RLG	prem1_AC200105_6751	structural	9914	chr4	126978551	126988461	chr4_AW_BlockID_17912	9910	SNP_Depleted_B73_CML52_47
NAM_TE	HP301	chr2	78863521	78872816	repeat_region_9339	classI	RLC	ji_AC215728_13156	structural	9295	chr2	78863525	78872816	chr2_AW_BlockID_15286	9291	SNP_Depleted_B73_HP301_48
NAM_TE	HP301	chr7	84815417	84815545	TE_homo_831203	classII	DTH	DTH_ZM00361_consensus	homology	128	chr7	84815416	84815548	chr7_AW_BlockID_11921	132	SNP_Depleted_B73_HP301_55
NAM_TE	HP301	chr8	107514160	107515702	TE_struc_21253	classII	DTC	DTC_ZM00122_consensus	structural	1542	chr8	107514156	107515702	chr8_AW_BlockID_18910	1546	SNP_Depleted_B73_HP301_59
NAM_TE	HP301	chr9	120935320	120936862	TE_struc_23538	classII	DTC	DTC_ZM00122_consensus	structural	1542	chr9	120935319	120936865	chr9_AW_BlockID_18702	1546	SNP_Depleted_B73_HP301_60
NAM_TE	Ki11	chr4	134166238	134166643	TE_struc_11378	classII	DTA	DTA_ZM00383_consensus	structural	405	chr4	134166239	134166644	chr4_AW_BlockID_17775	405	SNP_Depleted_B73_Ki11_64
NAM_TE	Ki3	chr5	117859004	117871080	repeat_region_28715	classI	RLX	ji_AC209892_10463	structural	12076	chr5	117859002	117871074	chr5_AW_BlockID_20096	12072	SNP_Depleted_B73_Ki3_68
NAM_TE	Ky21	chr10	51613121	51622423	repeat_region_49051	classI	RLC	ji_AC215728_13156	structural	9302	chr10	51613120	51622418	chr10_AW_BlockID_5605	9298	SNP_Depleted_B73_Ky21_72
NAM_TE	Ky21	chr10	52515649	52523230	repeat_region_49079	classI	RLG	CRM2_7577nt	structural	7581	chr10	52515653	52523230	chr10_AW_BlockID_5611	7577	SNP_Depleted_B73_Ky21_72
NAM_TE	Ky21	chr10	52879764	52887344	repeat_region_49089	classI	RLG	CRM2_7577nt	structural	7580	chr10	52879768	52887344	chr10_AW_BlockID_5615	7576	SNP_Depleted_B73_Ky21_72
NAM_TE	Ky21	chr10	52992086	52999677	repeat_region_49096	classI	RLG	CRM2_7577nt	structural	7591	chr10	52992090	52999677	chr10_AW_BlockID_5619	7587	SNP_Depleted_B73_Ky21_72
NAM_TE	Ky21	chr10	72353935	72354304	TE_homo_1103185	classII	DTA	DTA_ZM00117_consensus	homology	369	chr10	72353934	72354312	chr10_AW_BlockID_5645	378	SNP_Depleted_B73_Ky21_73
NAM_TE	Ky21	chr10	62479983	62491754	repeat_region_49355	classI	RLC	giepum_AC197531_5634	structural	11771	chr10	62479982	62491749	chr10_AW_BlockID_5633	11767	SNP_Depleted_B73_Ky21_73
NAM_TE	Ky21	chr3	87903054	87910636	repeat_region_15480	classI	RLG	CRM2_7577nt	structural	7582	chr3	87903058	87910636	chr3_AW_BlockID_12687	7578	SNP_Depleted_B73_Ky21_82
NAM_TE	Ky21	chr3	86702409	86709982	repeat_region_15423	classI	RLG	CRM2_7577nt	structural	7573	chr3	86702414	86709983	chr3_AW_BlockID_12679	7569	SNP_Depleted_B73_Ky21_82
NAM_TE	Ky21	chr3	88619145	88626726	repeat_region_15515	classI	RLG	CRM2_7577nt	structural	7581	chr3	88619142	88626719	chr3_AW_BlockID_12703	7577	SNP_Depleted_B73_Ky21_82
NAM_TE	Ky21	chr3	90862380	90870745	repeat_region_15567	classI	RLX	TE_00009447	structural	8365	chr3	90862378	90870739	chr3_AW_BlockID_12715	8361	SNP_Depleted_B73_Ky21_82
NAM_TE	Ky21	chr6	47484105	47488295	TE_homo_709514	classI	RLG	flip_AC208040_9765	homology	4190	chr6	47484106	47488288	chr6_AW_BlockID_5512	4182	SNP_Depleted_B73_Ky21_89
NAM_TE	Ky21	chr6	51313475	51313769	TE_homo_711714	classII	DTC	DTC_ZM00089_consensus	homology	294	chr6	51313460	51313767	chr6_AW_BlockID_5521	307	SNP_Depleted_B73_Ky21_90
NAM_TE	Ky21	chr7	46087140	46087297	TE_homo_802170	classII	DTA	DTA_ZM00073_consensus	homology	157	chr7	46087140	46087298	chr7_AW_BlockID_9135	158	SNP_Depleted_B73_Ky21_92
NAM_TE	Ky21	chr7	59357560	59357871	TE_homo_810987	classII	DTC	DTC_ZM00089_consensus	homology	311	chr7	59357566	59357873	chr7_AW_BlockID_9175	307	SNP_Depleted_B73_Ky21_94
NAM_TE	Ky21	chr7	68887088	68887890	TE_struc_17987	classII	DTA	TE_00015958	structural	802	chr7	68887087	68887898	chr7_AW_BlockID_9193	811	SNP_Depleted_B73_Ky21_94
NAM_TE	Ky21	chr7	71431919	71432324	TE_struc_17996	classII	DTA	DTA_ZM00383_consensus	structural	405	chr7	71431910	71432324	chr7_AW_BlockID_9197	414	SNP_Depleted_B73_Ky21_94
NAM_TE	Ky21	chr7	67649463	67649776	TE_homo_815426	classII	DTC	DTC_ZM00089_consensus	homology	313	chr7	67649467	67649774	chr7_AW_BlockID_9187	307	SNP_Depleted_B73_Ky21_94
NAM_TE	M162W	chr5	52003119	52010863	repeat_region_26385	classI	RLX	M162W_chr5:52003124..52010858	structural	7744	chr5	52003125	52010865	chr5_AW_BlockID_11018	7740	SNP_Depleted_B73_M162W_103
NAM_TE	M37W	chr4	48967651	48975983	TE_homo_447984	classI	RLG	cinful_zeon_AC177813_189	homology	8332	chr4	48967637	48976169	chr4_AW_BlockID_9181	8532	SNP_Depleted_B73_M37W_110
NAM_TE	M37W	chr6	55573932	55574167	TE_struc_15923	classII	DTC	M37W_chr6:55573932..55574167	structural	235	chr6	55573931	55574170	chr6_AW_BlockID_6510	239	SNP_Depleted_B73_M37W_112
NAM_TE	Mo18W	chr1	139839203	139839779	TE_homo_77006	classI	RLG	ansuya_AC207803_9728	homology	576	chr1	139839197	139839779	chr1_AW_BlockID_25859	582	SNP_Depleted_B73_Mo18W_114
NAM_TE	Mo18W	chr10	17979303	17988162	repeat_region_48681	classI	RLX	ji_AC204382_8228	structural	8859	chr10	17979308	17988163	chr10_AW_BlockID_3396	8855	SNP_Depleted_B73_Mo18W_115
NAM_TE	Ms71	chr2	153976538	153976773	TE_struc_5929	classII	DTC	Ms71_chr2:153976538..153976773	structural	235	chr2	153976537	153976776	chr2_AW_BlockID_25318	239	SNP_Depleted_B73_Ms71_123
NAM_TE	Ms71	chr3	86415587	86423170	repeat_region_15466	classI	RLG	CRM2_7577nt	structural	7583	chr3	86415592	86423171	chr3_AW_BlockID_12395	7579	SNP_Depleted_B73_Ms71_126
NAM_TE	Ms71	chr3	87560001	87567584	repeat_region_15526	classI	RLG	CRM2_7577nt	structural	7583	chr3	87560005	87567584	chr3_AW_BlockID_12407	7579	SNP_Depleted_B73_Ms71_126
NAM_TE	Ms71	chr3	88266492	88272711	repeat_region_15555	classI	RLG	CRM2_7577nt	structural	6219	chr3	88266497	88272712	chr3_AW_BlockID_12419	6215	SNP_Depleted_B73_Ms71_126
NAM_TE	Ms71	chr3	86635816	86643394	repeat_region_15476	classI	RLG	CRM2_7577nt	structural	7578	chr3	86635809	86643383	chr3_AW_BlockID_12399	7574	SNP_Depleted_B73_Ms71_126
NAM_TE	Ms71	chr6	126808478	126808873	TE_struc_17020	classII	DTA	DTA_ZM00383_consensus	structural	395	chr6	126808477	126808874	chr6_AW_BlockID_17875	397	SNP_Depleted_B73_Ms71_134
NAM_TE	NC358	chr5	97485020	97495268	repeat_region_27757	classI	RLG	NC358_chr5:97485025..97495263	structural	10248	chr5	97485019	97495263	chr5_AW_BlockID_17321	10244	SNP_Depleted_B73_NC358_140
NAM_TE	NC358	chr5	102946167	102953749	repeat_region_27900	classI	RLG	CRM2_7577nt	structural	7582	chr5	102946165	102953743	chr5_AW_BlockID_17331	7578	SNP_Depleted_B73_NC358_140
NAM_TE	NC358	chr5	97811403	97820750	repeat_region_27769	classI	RLC	ji_AC215728_13156	structural	9347	chr5	97811402	97820745	chr5_AW_BlockID_17323	9343	SNP_Depleted_B73_NC358_140
NAM_TE	NC358	chr5	104006218	104013264	repeat_region_27937	classI	RLG	CRM2_7577nt	structural	7046	chr5	104006217	104013259	chr5_AW_BlockID_17345	7042	SNP_Depleted_B73_NC358_141
NAM_TE	NC358	chr5	104480262	104487844	repeat_region_27949	classI	RLG	CRM2_7577nt	structural	7582	chr5	104480266	104487844	chr5_AW_BlockID_17347	7578	SNP_Depleted_B73_NC358_141
NAM_TE	NC358	chr5	104822048	104829627	repeat_region_27961	classI	RLG	CRM2_7577nt	structural	7579	chr5	104822046	104829621	chr5_AW_BlockID_17351	7575	SNP_Depleted_B73_NC358_141
NAM_TE	NC358	chr5	109185620	109195819	repeat_region_28089	classI	RLG	prem1_AC212325_11702	structural	10199	chr5	109185624	109195819	chr5_AW_BlockID_17361	10195	SNP_Depleted_B73_NC358_142
NAM_TE	NC358	chr5	109917027	109917311	TE_struc_14025	classII	DTH	NC358_chr5:109917027..109917311	structural	284	chr5	109917026	109917314	chr5_AW_BlockID_17363	288	SNP_Depleted_B73_NC358_142
NAM_TE	Oh43	chr10	105902746	105903151	TE_struc_25906	classII	DTA	DTA_ZM00383_consensus	structural	405	chr10	105902745	105903159	chr10_AW_BlockID_13185	414	SNP_Depleted_B73_Oh43_149
NAM_TE	Oh43	chr4	45099713	45100282	TE_struc_11265	classII	DTA	DTA_ZM00297_consensus	structural	569	chr4	45099712	45100290	chr4_AW_BlockID_8713	578	SNP_Depleted_B73_Oh43_151
NAM_TE	Oh43	chr4	56787963	56796845	repeat_region_20621	classI	RLX	ji_AC204382_8228	structural	8882	chr4	56787967	56796845	chr4_AW_BlockID_8723	8878	SNP_Depleted_B73_Oh43_151
NAM_TE	Oh43	chr5	43019057	43019302	TE_struc_14244	classII	DTM	Oh43_chr5:43019057..43019302	structural	245	chr5	43019047	43019302	chr5_AW_BlockID_10462	255	SNP_Depleted_B73_Oh43_153
NAM_TE	Oh43	chr5	67375330	67384634	repeat_region_27025	classI	RLC	ji_AC215728_13156	structural	9304	chr5	67375334	67384634	chr5_AW_BlockID_12989	9300	SNP_Depleted_B73_Oh43_155
NAM_TE	Oh43	chr5	102165324	102165632	TE_homo_619440	classII	DTC	DTC_ZM00089_consensus	homology	308	chr5	102165321	102165627	chr5_AW_BlockID_17105	306	SNP_Depleted_B73_Oh43_156
NAM_TE	Oh43	chr5	104056529	104064112	repeat_region_27946	classI	RLG	CRM2_7577nt	structural	7583	chr5	104056533	104064112	chr5_AW_BlockID_17109	7579	SNP_Depleted_B73_Oh43_156
NAM_TE	Oh43	chr5	106285606	106293188	repeat_region_28024	classI	RLG	CRM2_7577nt	structural	7582	chr5	106285610	106293188	chr5_AW_BlockID_17127	7578	SNP_Depleted_B73_Oh43_156
NAM_TE	Oh43	chr5	104179296	104188595	repeat_region_27952	classI	RLC	ji_AC215728_13156	structural	9299	chr5	104179295	104188590	chr5_AW_BlockID_17111	9295	SNP_Depleted_B73_Oh43_156
NAM_TE	Oh43	chr5	104692319	104699896	repeat_region_27970	classI	RLG	CRM2_7577nt	structural	7577	chr5	104692323	104699896	chr5_AW_BlockID_17115	7573	SNP_Depleted_B73_Oh43_156
NAM_TE	Oh43	chr5	104726426	104734009	repeat_region_27972	classI	RLG	CRM2_7577nt	structural	7583	chr5	104726430	104734009	chr5_AW_BlockID_17117	7579	SNP_Depleted_B73_Oh43_156
NAM_TE	Oh43	chr5	155254283	155254688	TE_struc_15048	classII	DTA	DTA_ZM00383_consensus	structural	405	chr5	155254273	155254687	chr5_AW_BlockID_21354	414	SNP_Depleted_B73_Oh43_159
NAM_TE	Oh43	chr7	112214559	112223856	repeat_region_37748	classI	RLC	ji_AC215728_13156	structural	9297	chr7	112214563	112223856	chr7_AW_BlockID_17075	9293	SNP_Depleted_B73_Oh43_164
NAM_TE	Oh7B	chr1	174128644	174137186	repeat_region_4182	classI	RLX	ji_AC204382_8228	structural	8542	chr1	174128648	174137186	chr1_AW_BlockID_28433	8538	SNP_Depleted_B73_Oh7B_171
NAM_TE	Oh7B	chr4	17854775	17855068	TE_homo_436517	classII	DTH	ZM_Tourist_19	homology	293	chr4	17854773	17855064	chr4_AW_BlockID_2852	291	SNP_Depleted_B73_Oh7B_184
NAM_TE	Oh7B	chr8	51479626	51480524	TE_homo_914730	classI	RLG	CRM2_7577nt	homology	898	chr8	51479622	51480520	chr8_AW_BlockID_6476	898	SNP_Depleted_B73_Oh7B_193
NAM_TE	Oh7B	chr8	50997267	51004840	repeat_region_40634	classI	RLG	CRM2_7577nt	structural	7573	chr8	50997266	51004835	chr8_AW_BlockID_6472	7569	SNP_Depleted_B73_Oh7B_193
NAM_TE	Oh7B	chr8	51455725	51463297	TE_homo_914707	classI	RLG	CRM2_7577nt	homology	7572	chr8	51455724	51463302	chr8_AW_BlockID_6474	7578	SNP_Depleted_B73_Oh7B_193
NAM_TE	Oh7B	chr8	96127389	96127682	TE_homo_937206	classII	DTH	ZM_Tourist_19	homology	293	chr8	96127388	96127679	chr8_AW_BlockID_9125	291	SNP_Depleted_B73_Oh7B_194
NAM_TE	Oh7B	chr9	84676554	84677243	TE_homo_1026090	classI	RLC	ji_AC204382_8228	homology	689	chr9	84676553	84677231	chr9_AW_BlockID_6594	678	SNP_Depleted_B73_Oh7B_196
NAM_TE	Oh7B	chr9	96242130	96249710	repeat_region_46185	classI	RLG	CRM2_7577nt	structural	7580	chr9	96242125	96249701	chr9_AW_BlockID_6608	7576	SNP_Depleted_B73_Oh7B_197
NAM_TE	P39	chr9	89837126	89838557	TE_struc_23390	classII	DTA	DTA_ZM00060_consensus	structural	1431	chr9	89837125	89838565	chr9_AW_BlockID_12939	1440	SNP_Depleted_B73_P39_202
NAM_TE	Tx303	chr3	64617222	64617457	TE_struc_8005	classII	DTC	Tx303_chr3:64617222..64617457	structural	235	chr3	64617223	64617462	chr3_AW_BlockID_11442	239	SNP_Depleted_B73_Tx303_205
NAM_TE	Tx303	chr3	68133908	68138033	TE_struc_8015	classII	DTC	Tx303_chr3:68133908..68138033	structural	4125	chr3	68133907	68138036	chr3_AW_BlockID_11448	4129	SNP_Depleted_B73_Tx303_205
NAM_TE	Tx303	chr5	48976928	48977290	TE_homo_602702	classI	RLX	utar_AC212228_11664	homology	362	chr5	48976928	48977284	chr5_AW_BlockID_10605	356	SNP_Depleted_B73_Tx303_207
NAM_TE	Tx303	chr5	67928177	67937500	repeat_region_26887	classI	RLC	ji_AC215728_13156	structural	9323	chr5	67928176	67937495	chr5_AW_BlockID_12417	9319	SNP_Depleted_B73_Tx303_208
